1           **Evolution with private resources reverses some changes**  
2                   **from long-term evolution with public resources**

3  
4  
5           Katrina van Raay<sup>1,2</sup>, Sergey Stolyar<sup>2,3</sup>, Jordana Sevigny<sup>1,2</sup>, Jeremy A. Draghi<sup>4</sup>,  
6           Richard E. Lenski<sup>2,5</sup>, Christopher J. Marx<sup>2,3,6,7</sup>, Benjamin Kerr<sup>1,2</sup>, Luis Zaman<sup>2,8</sup>

7  
8                   1. *Department of Biology, University of Washington, Seattle, WA;*

9                   2. *BEACON Center for the Study of Evolution in Action, Michigan State University, East Lansing, MI;*

10                   3. *Department of Biological Sciences, University of Idaho, Moscow, ID;*

11                   4. *Department of Biological Sciences, Virginia Tech, Blacksburg, VA;*

12                   5. *Department of Microbiology and Molecular Sciences; Michigan State University, East Lansing, MI;*

13                   6. *Institute for Modeling Collaboration and Innovation, University of Idaho, Moscow, ID;*

14                   7. *Institute for Bioinformatics and Evolutionary Studies, University of Idaho, Moscow, ID;*

15                   8. *Department of Ecology and Evolutionary Biology, and Center for the Study of Complex Systems,*  
16                                   *University of Michigan, Ann Arbor, MI.*

17

18

19

20

21

22

23 **Abstract**

24 A population under selection to improve one trait may evolve a sub-optimal state for another trait  
25 due to tradeoffs and other evolutionary constraints. How this evolution affects the capacity of a  
26 population to adapt when conditions change to favor the second trait is an open question. We  
27 investigated this question using isolates from a lineage spanning 60,000 generations of the Long-  
28 Term Evolution Experiment (LTEE) with *Escherichia coli*, where cells have access to a shared  
29 pool of resources, and have evolved increased competitive ability and a concomitant reduction in  
30 numerical yield. Using media-in oil emulsions we shifted the focus of selection to numerical yield,  
31 where cells grew in isolated patches with private resources. We found that the time spent evolving  
32 under shared resources did not affect the ability to re-evolve toward higher numerical yield. The  
33 evolution of numerical yield commonly occurred through mutations in the phosphoenolpyruvate  
34 phosphotransferase system. These mutants exhibit slower uptake of glucose, making them poorer  
35 competitors for public resources, and produce smaller cells that release less carbon as overflow  
36 metabolites. Our results demonstrate that mutations that were not part of adaptation under one  
37 selective regime may enable access to ancestral phenotypes when selection changes to favor  
38 evolutionary reversion.

39

40 **Keywords:** evolution, tradeoffs, constraints, metabolism

41

## 42 **Introduction**

43           The history of life has been inextricably shaped by evolutionary constraints. Given  
44 phenotypic trade-offs, an organism cannot simultaneously optimize two traits with respect to  
45 fitness (Agrawal et al. 2010; Stearns 1989). Thus, a population under strong selection to improve  
46 one trait may evolve a sub-optimal state for another trait. More generally, pleiotropy means that  
47 mutations in one gene affect multiple traits simultaneously (Pavličev & Cheverud, 2015), and  
48 antagonistic pleiotropy occurs when mutations are beneficial for one trait but detrimental for  
49 another. While there is a rich literature on evolutionary tradeoffs (Beardmore et al. 2011; Gounand  
50 et al. 2016; Guillaume & Otto, 2012) and antagonistic pleiotropy (Rose, 1982; Rose, 1985), there  
51 has been less attention given to how the evolutionary history of a lineage under selection for one  
52 trait affects its subsequent trajectory when selection shifts to favor a second trait that trades off  
53 with the first (but see Ostrowski et al. 2015; Teotónio & Rose, 2000; Travisano & Lenski, 1996;  
54 Velicer, 1999).

55           To understand how previous adaptation might affect future evolution, let us imagine a  
56 population under long-term selection for one trait that trades off with a second trait (Figure 1a).  
57 For simplicity, we assume higher values of each trait correspond to higher fitness when under  
58 selection. Long-term improvement in the favored trait (trait 1 in Figure 1a) occurs along with  
59 concomitant decreases in the second trait (trait 2). If selection shifted to favoring trait 2, how would  
60 the duration of history evolving under selection for trait 1 affect future evolution (Figure 1b)?  
61 There are at least two plausible hypotheses about how that duration would influence the rate of  
62 adaptation. The “Mutational Access” hypothesis (Figure 1c) posits that populations that spent more  
63 time under selection for trait 1 have fewer available mutations that would improve fitness by  
64 increasing trait 2 (i.e., the “late descendant” compared to the “intermediate descendant” in Figure

65 1a). If so, then this would lead to a *lower* rate of adaptation for the late descendant than for the  
66 intermediate one when trait 2 is favored. This mutational limitation could result from the necessity  
67 of compensating for (or reverting) more mutational steps; alternatively, it might occur if mutations  
68 increasing trait 2 become increasingly deleterious over time due to the entrenchment of trait 1  
69 (Schank & Wimsatt, 2011; Shah et al. 2015). The “Strength of Selection” hypothesis (Figure 1d),  
70 by contrast, suggests that the intermediate and late descendants have equal access to mutations  
71 improving trait 2, but the selective benefits for the late descendant are greater due to the relatively  
72 larger changes in fitness upon improvement (Barrick et al. 2010; Chou et al. 2011). Under this  
73 hypothesis, the rate of adaptation is predicted to be *higher* for the late descendant.

74         If adaptation is possible under selection for trait 2, then we expect a return towards the  
75 progenitor’s value of that trait. Does this phenotypic return occur by “rediscovering” the ancestral  
76 genetic and mechanistic underpinnings of the second trait (Levin et al. 1997; Pennings et al. 2020)?  
77 This rediscovery could occur by reverting key mutations, or by otherwise returning to the  
78 regulatory, physiological, or metabolic states that enabled the progenitor’s phenotype. Indeed, the  
79 mechanisms that underly a return to the ancestral state (e.g., Figures 1b-d) might differ depending  
80 on whether evolution is initiated with intermediate or late descendants.

81

82

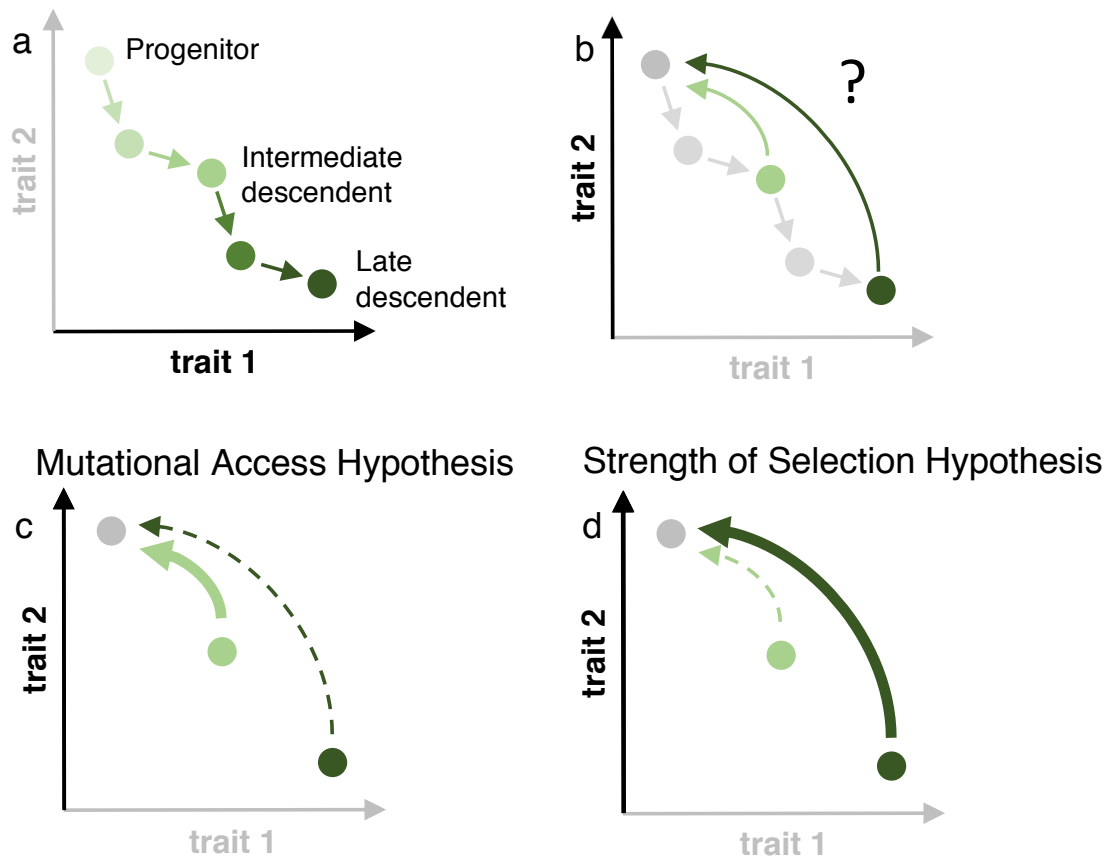

83  
 84 **Figure 1: Evolutionary trajectories and alternative hypotheses.** a) A population evolves under direct selection for  
 85 one trait (trait 1, bolded axis). A higher value along either axis indicates an improvement in that trait under selection.  
 86 Each circle represents a genotype in an evolutionary line of descent. We focus on three genotypes along an  
 87 evolutionary trajectory: the progenitor, an intermediate descendant, and a late descendant. b) Selection is relaxed for  
 88 trait 1 and strengthened for trait 2 (bolded axis). The curved arrow represents the transition of a population with  
 89 descendent traits towards traits that resemble the progenitor when selection acts on trait 2. Whether, how fast, and by  
 90 what mechanisms this transition occurs are the main questions addressed in this paper. c) Mutational access  
 91 hypothesis. Intermediate (light green) and late (dark green) descendants are shown after selection is relaxed on trait 1  
 92 and strengthened on trait 2. The width of arrows pointing from each descendent towards the progenitor indicates the  
 93 rate of change. The thick arrow from the intermediate descendent denotes a faster return to the progenitor phenotype  
 94 than the dashed arrow from the late descendent. Under this hypothesis, the late descendent is either mutationally  
 95 further from the progenitor state or the mutational options to revert to the progenitor phenotype are more costly due  
 96 to entrenchment. d) Strength of selection hypothesis. Intermediate (light green) and late (dark green) descendants are  
 97 shown when selection flips from favoring trait 1 to trait 2. The width of arrows pointing from each descendent towards  
 98 the progenitor indicates the relative strength of selection. The thick arrow from the late descendent indicates stronger  
 99 selection favoring a mutation that restores the ancestral phenotype, and thus a faster response, than for the same  
 100 mutation in the intermediate descendent (dashed arrow). Under this hypothesis, both descendants have the same  
 101 mutational access to various positions in phenotype space.

102  
 103

104           Here we present a realization of the thought experiment in Figure 1, in which we test how  
105 the length of time that populations of *Escherichia coli* had been selected for faster growth affects  
106 their future adaptation in a novel environment that favors increased numerical yield (i.e., number  
107 of cells per concentration of substrate added). To do so, we take advantage of the Long-Term  
108 Evolution Experiment (LTEE), in which 12 replicate populations of *E. coli* have been evolving for  
109 over 70,000 generations in a relatively simple environment (Lenski 2017; Vasi et al. 1994; Wisser  
110 et al. 2013). Periodic samples from each line have been frozen in suspended animation, so that the  
111 “progenitor,” “intermediate descendant,” and “late descendant” are available by reviving samples  
112 from this living fossil record. The well-stirred, unstructured environment maintains a single, public  
113 pool of resources for the population and thus favors rapid growth, above all else (Vasi et al. 1994,  
114 Novak et al. 2006). Furthermore, there is no expectation of direct selection for either numerical  
115 yield or metabolic yield (proportion of carbon in the substrate that is incorporated into biomass).  
116 In an unstructured environment, a mutant that consumes resources more slowly but efficiently is  
117 disadvantaged, because a faster-growing but less-efficient competitor can deplete the shared  
118 resources in the meantime. Instead, a mutant that grows faster has an advantage in an unstructured  
119 environment, even if it leads to a reduction in the population’s numerical yield, metabolic yield,  
120 or both.

121           The outcomes in the LTEE are slightly more complicated, and they are mediated in part by  
122 changes to a third trait: cell size (Mongold & Lenski 1996). All of the LTEE lineages show  
123 increases in competitive ability relative to their common ancestor, while simultaneously having  
124 lower numerical yields (Vasi et al. 1994, Wisser et al. 2013). The reductions in numerical yield  
125 result from the evolution of much larger individual cells (Lenski & Travisano 1994, Vasi et al.  
126 1994, Grant et al. 2021). In many bacteria, increased cell size is a physiological response to

127 increased growth rate (Johnston et al. 1979; Pierucci, 1978). In addition, some mutations in  
128 bacteria affect both growth and cell size or shape (Monds et al. 2014, Yulo & Hendrickson 2019).  
129 Therefore, it is reasonable to expect that selection for faster growth has led to larger cells and, as  
130 a pleiotropic consequence, decreased numerical yield.

131         These evolutionary changes also extend to metabolic yield—the efficiency with which  
132 carbon sources are converted into biomass. During exponential growth on glucose, when most of  
133 the doublings occur during the LTEE daily cycle, direct measurements of metabolic yield through  
134 central metabolism show a small (but significant) decrease in the evolved populations. The  
135 excretion of acetate, an overflow metabolite, also increased by about 50% in the LTEE (Harcombe  
136 et al. 2013). Similar to the case with cell size, some loci with beneficial mutations in the LTEE  
137 lineages are known to affect acetate metabolism (Quandt et al. 2015); it is also known that rapid  
138 growth *per se* leads to increased overflow metabolite production in *E. coli* (Barrick & Lenski 2009;  
139 Farmer & Jones 1976). This situation is further complicated, however, by the finding that the LTEE  
140 populations have evolved increased total biomass when measured after a full 24-hour growth cycle  
141 (Lenski & Mongold 2000, Novak et al. 2006). While the increase might be caused in part by a  
142 change in biomass composition, it also reflects an increased ability to use excreted metabolites  
143 after the glucose has been depleted. Indeed, the evolved LTEE strains have increased their ability  
144 to grow on acetate, as well as to grow on other overflow metabolites that the LTEE ancestor could  
145 not use (Leiby & Marx, 2014). Although there was no direct advantage to increased biomass in a  
146 well-mixed environment, nonetheless biomass increased alongside faster growth in the LTEE. This  
147 constellation of changes can be understood by considering that, in the novel environment of the  
148 LTEE, the ancestral strain was likely far from the trade-off front between growth rate and total  
149 biomass, leaving room for improvements in both traits (Novak et al. 2006).

150           Now consider what might happen if the bacteria that previously evolved in the LTEE  
151 moved to and evolved in a structured environment that was otherwise similar to the unstructured  
152 LTEE environment. By distributing a transplanted population into many isolated ‘patches,’ each  
153 seeded by a single cell, any resources saved by growing more efficiently would accrue  
154 disproportionately to cells with the same genotype, which would effectively eliminate resource  
155 competition. Now imagine that the cells in these patches were periodically pooled, diluted  
156 distributed as single founders over a new set of empty patches. In that case, selection would favor  
157 increased numerical yield since each individual cell is a potential propagule able to establish a new  
158 subpopulation. Increased numerical yield could be achieved by increasing the metabolic yield, by  
159 producing smaller individual cells, or perhaps by some combination of these changes. In this way,  
160 selection shifts to favor numerical yield over competitive ability for shared resources  
161 (accomplishing the transformation from Figure 1a to Figure 1b in our thought experiment).

162           In our study, we achieve this shift by propagating cells in water-in-oil emulsions comprised  
163 of millions of aqueous media-filled droplets surrounded by an oil phase (Figure 2) (Bachmann et  
164 al. 2013). If a population of cells is diluted sufficiently before creation of the emulsion, then each  
165 cell will usually be the sole occupant of a droplet. In such a case, barring mutation, there is no  
166 competition between genotypes for resources, as each cell (and its progeny) has access to a private  
167 resource supply demarcated by the droplet. If growth of isolated cells inside droplets proceeds for  
168 sufficient time to exhaust the substrate and is followed by demulsification, dilution, and  
169 redistribution into droplets across successive transfers (as in Figure 2a), then those genotypes that  
170 produce *more* cells (rather than the fastest-growing cells) will have an advantage. Indeed, prior  
171 experiments have demonstrated that various forms of isolation can favor numerical yield at the



172 expense of competitive ability in several different biological systems (Bachmann et al. 2013;  
173 Eshelman et al. 2010; Kerr et al. 2006; van Tatenhove-Pel et al. 2021).

174 Here, we instantiate the thought experiment of Figure 1 by considering two bacterial traits:  
175 competitive ability (the relative increase in proportion of a focal strain when competing with  
176 another strain for shared resources) and numerical yield (the absolute number of cells produced by  
177 a focal strain when resources are not shared). We focus on a single LTEE lineage in order to  
178 explore how previous selection for one trait (competitive ability) affects the tempo and mode of  
179 evolution under selection for a second trait (numerical yield) in the presence of a phenotypic  
180 tradeoff. We probe how the length of time adapting to the well-mixed LTEE regime affects the  
181 ability of a population to adapt under the new emulsion condition. We examine whether increases  
182 in numerical yield during growth with private resources come with associated decreases in  
183 competitive ability for shared resources, and whether they are achieved through changes in  
184 metabolic yield and associated overflow metabolite production, decreases in cell size, or by both  
185 factors. Finally, by determining the nature and number of mutations that occurred, we can  
186 investigate whether any evolutionary reversions to the ancestral phenotypes were caused by  
187 changes in the same loci/processes that were implicated in the evolution of fast growth in the  
188 original LTEE environment.

189

## 190 **Methods**

### 191 *Strains*

192 All experiments were founded with *E. coli* B isolates that came from the Ara-5 lineage in the  
193 LTEE. The isolates used in our experiment came from 0 generations (the founder of the LTEE),  
194 20,000 generations, and 60,000 generations of evolution in the LTEE (Table S1; hereafter called

195 0K, 20K, and 60K, respectively). The 0K isolate is the ultimate progenitor of the 20K and 60K  
196 isolates in the context of the LTEE. However, because we conduct evolution experiments in the  
197 emulsion system with these three strains, we will refer to these LTEE isolates as the “0K emulsion  
198 ancestor”, the “20K emulsion ancestor”, and the “60K emulsion ancestor”.

199

### 200 *Emulsion evolution experiment*

201 Following the pioneering work of Bachmann et al. (2013), we propagated three replicate  
202 cultures founded by each of the three LTEE isolates (the emulsion ancestors) under selection for  
203 increased numerical yield by using water-in-oil emulsions for 100 transfers. This method (see  
204 below) creates millions of media-filled, picoliter-sized droplets surrounded by an oil phase, in  
205 which bacterial cells in one droplet are isolated from those in others (Figure 2). Emulsions were  
206 set up in 1.5-ml Eppendorf conical microcentrifuge tubes, and they were incubated at 37 °C  
207 without shaking.

208 In order to select for increased numerical yield, we diluted the bacterial culture before  
209 setting up the emulsions, such that 90% of occupied droplets would contain only 1 cell at the  
210 beginning of each transfer cycle. We subsequently showed that occupied droplets had an average  
211 of 1.12 cells (see Supplementary section *Calculating Droplet Statistics*). Bacteria were allowed to  
212 grow and divide in droplets for 24 hours, after which the droplets were broken with 1*H*,1*H*,2*H*,2*H*-  
213 perfluoro-1-octanol, releasing all the cells into a common pool. A fraction of the cells from this  
214 pool were immediately used to initiate the next transfer (see Figure 2a). Because of the level of  
215 dilution before emulsification, lineages from this treatment have evolved in “private droplets” (see  
216 Figure 2c). This treatment was continued for 100 transfers.

217

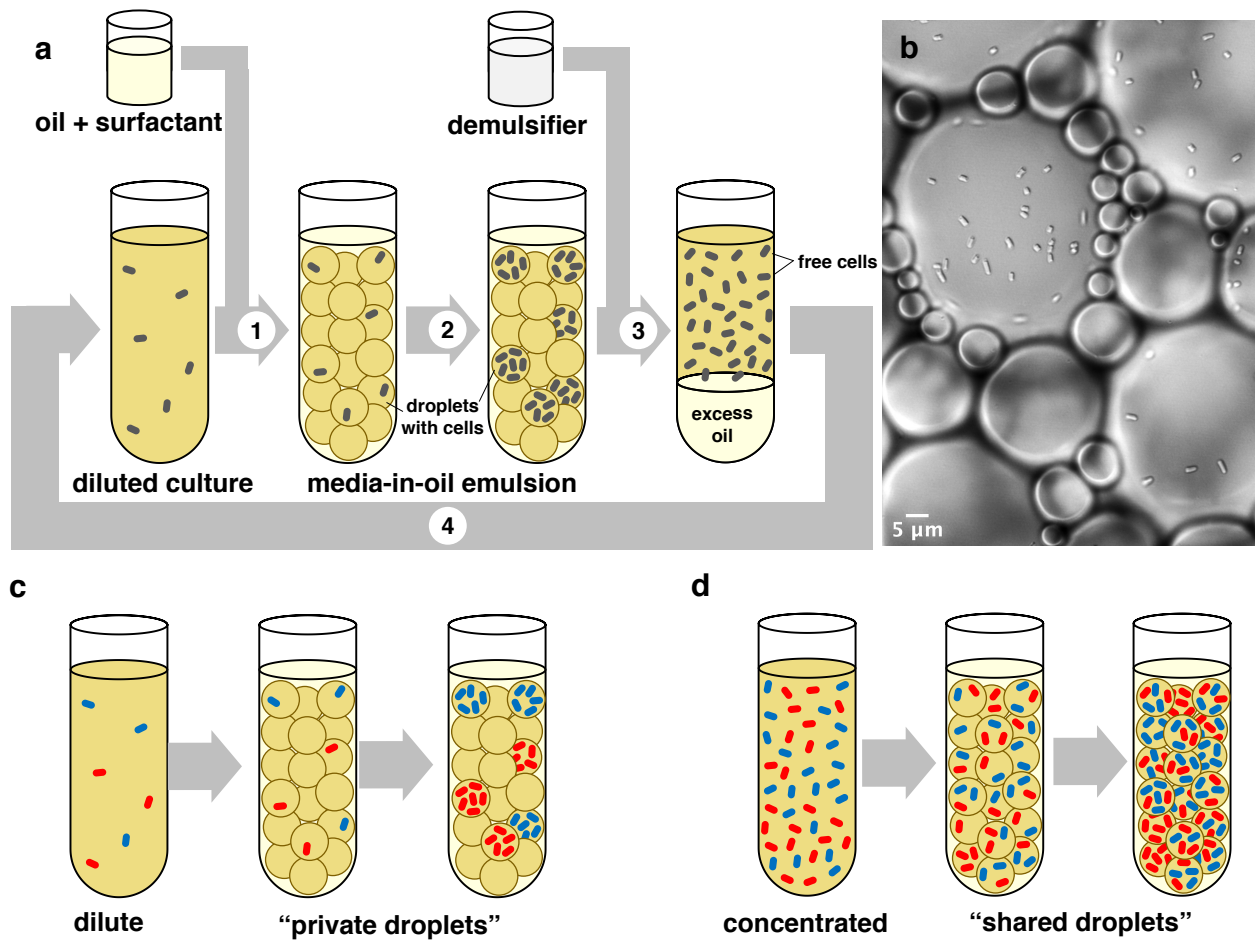

218

219 **Figure 2: a)** Schematic of transfer protocol: 1. A mixture of oil and surfactant is added to a diluted culture of bacteria  
220 in growth media and vortexed to form millions of droplets, 2. Bacteria in the emulsion are incubated to allow  
221 subpopulation growth within the droplets, 3. After overnight growth, a demulsifier is added to break the emulsion and  
222 resuspend the bacteria, 4. The free cells are diluted into fresh media and the cycle is repeated, **b)** Micrograph of  
223 bacteria growing in emulsion droplets, **c)** Schematic of inoculation and growth for private droplets, **d)** Schematic of  
224 inoculation and growth for shared droplets. For parts c and d, the two colors of bacterial cells represent distinct  
225 genotypes.

226

227 To control for any effects of growing in emulsions, we also propagated three replicate  
228 cultures founded by each LTEE isolate for 100 transfers under higher starting-density conditions,  
229 in which each occupied droplet had almost 3 cells on average (see Supplementary section

230 *Calculating Droplet Statistics*). We predicted that we would not observe evolution towards  
231 increased numerical yield in this “shared-droplet” treatment (see Figure 2d).

232 During the evolution experiment, the cell density of freshly broken emulsions was  
233 measured with a FilterMax F5 Multi-Mode Microplate Reader (Molecular Devices) after 24 hours.  
234 Briefly, we pipetted 150  $\mu$ l of overnight culture from a broken emulsion into a flat-bottom 96-well  
235 microtiter plate, and we recorded an OD<sub>595</sub> reading. This reading was then used to estimate cell  
236 density using a calibration curve giving the relationship between OD<sub>595</sub> and CFU/ml, which was  
237 established in prior experiments. Cultures were then diluted to  $2 \times 10^6$  CFU/ml for the private  
238 droplet treatment and  $5 \times 10^7$  CFU/ml for the shared droplet treatment. Emulsions were created  
239 by adding 200  $\mu$ l of a mixture of 9 parts Novec 7500 HFE to 1 part Pico-surf (5% (w/w)) to 300  
240  $\mu$ l of diluted culture in the growth medium DM1000 in 1.5 ml Eppendorf tubes, and vortexing at  
241 maximum speed for 2 minutes. DM1000 contains 1000 mg/l of glucose, and it was used instead  
242 of the DM25 (25 mg/l glucose) used in the LTEE because DM1000 exhibited clearer differences  
243 between the 0K and 60K samples in terms of numerical yield and competitive ability than DM25  
244 in pilot experiments.

245 Single-colony isolates were picked from each population at the end of our evolution  
246 experiment (after transfer 100) and frozen at -80 °C as 20% v/v glycerol stocks. We refer to these  
247 evolved isolates as “emulsion descendants.” Two loci previously shown to distinguish the 0K,  
248 20K, and 60K ancestors were Sanger sequenced for each isolate to confirm the intended derivation  
249 of the isolates. We detected within-experiment contamination via Sanger and subsequent whole-  
250 genome sequencing in 4 of the 18 emulsion descendants, so these populations were dropped from  
251 our analysis. The complete genomes of the remaining 14 strains (8 private droplet, 6 shared  
252 droplet) were sequenced and analyzed, and the 6 isolates of private-droplet descendants that had

253 mutations were used for further analysis. For the shared droplet treatment, one descendent was  
254 randomly chosen from each lineage to be assessed in the phenotypic assays (3 isolates).

255

### 256 *Competition assays*

257 Using the frozen samples of the emulsion ancestors (0K, 20K, and 60K) and their emulsion  
258 descendants from the private and shared droplet treatments, we assessed the relative competitive  
259 abilities of all of our strains. The emulsion descendants competed against a common marked strain  
260 (equivalent to our 0K emulsion ancestor) in shared droplet conditions. We used a neutral marker  
261 (a point mutation in the *araA* gene) to distinguish the focal and common competitor strains on  
262 tetrazolium-arabinose indicator agar plates.

263 Competitions ran for 3 transfer cycles in emulsions. Competitions were initiated with a 1:1  
264 ratio of the focal strain (denoted  $F$ ) to the common competitor (denoted  $C$ ). The competitive ability  
265 of the focal strain relative to the common competitor ( $w(F, C)$ ) was assessed by calculating a ratio  
266 of their realized Malthusian growth rates (Lenski et al. 1991):

$$267 \quad w(F, C) = \frac{\ln \frac{F_{\text{final}}}{F_{\text{initial}}} + \sum_{i=2}^3 \ln z_i}{\ln \frac{C_{\text{final}}}{C_{\text{initial}}} + \sum_{i=2}^3 \ln z_i},$$

268 where  $X_{\text{initial}}$  and  $X_{\text{final}}$  are the initial (beginning of the first transfer) and final (end of the third  
269 transfer) densities, respectively, of strain  $X$  (with  $X \in \{F, C\}$ ) and  $z_i$  is the factor by which the  
270 population is diluted in order to initiate the  $i^{\text{th}}$  transfer.

271

### 272 *Genome Sequencing*

273 Single-colony isolates from 14 evolved lines and their 3 ancestors were grown in DM1000  
274 and frozen as 20% v/v glycerol stocks at  $-80^\circ\text{C}$ . For genome sequencing, cells from these frozen

275 stocks were reanimated in 5 ml of LB (lysogeny broth). Genomic DNA was extracted using a  
276 Qiagen DNEasy kit with 1 ml of overnight culture, following the manufacture's protocol. Library  
277 preparation and sequencing for 16 strains was done at the Microbial Genome Sequencing Center  
278 (MiGS) at the University of Pittsburgh. One strain (the 0K emulsion ancestor) was sequenced at  
279 the University of Washington on Illumina's NextSeq platform and prepped with Illumina Nextera  
280 barcodes. Genome sequences had an average of 131X coverage.

281 Mutations (predicted mutations, unassigned missing coverage, and unassigned new  
282 junctions) were called using breseq (Version 0.33.2) (Deatherage & Barrick, 2014) with default  
283 parameters. All mutations were confirmed using Integrative Genomics Viewer (Robinson et al.  
284 2011), and four point mutations identified in strains that differed phenotypically from their  
285 ancestors in cell size or numerical yield were Sanger sequenced for confirmation (Table S4).

286

### 287 *Numerical yield and cell size assays*

288 Populations of each emulsion ancestor and descendant were grown under the shared-  
289 droplet conditions over a standard 24-hour growth cycle. We used the shared-droplet emulsions  
290 instead of the well-stirred conditions to control for the microenvironmental effects of growing in  
291 an emulsion (e.g., oxygen depletion during growth). The final cell number in the 24-hour sample  
292 was used as our measure of numerical yield. Cell size was measured as the median cell volume  
293 ( $\mu\text{m}^3$ ) of several thousand cells using a Beckman Coulter MSE 4 instrument.

294

### 295 *Metabolic analysis*

296 Supernatants from the yield assays were filtered and stored at -80 °C prior to metabolic  
297 analysis. After thawing, samples were analyzed using High Performance Liquid Chromatography

298 (HPLC) on a 20A chromatographic system (Shimadzu) equipped with diode array and refractive  
299 index detectors. Samples were eluted with 6 mM H<sub>2</sub>SO<sub>4</sub> at a flow rate of 0.6 ml/min from an  
300 Aminex HPX 87H organic acid analysis column (300 by 7.8 mm) (BioRad). We recorded the areas  
301 for all noticeable peaks associated with detected metabolites (glucose, citrate, acetate, formate, and  
302 lactate), and these values were converted to metabolite concentrations (in mM) using organic acid  
303 and sugar standards (from BioRad or made in-house). Citrate, an iron chelator present in DM  
304 medium, is neither produced nor consumed by these bacterial strains, and it has been shown not to  
305 affect the growth of the Ara-5 lineage (Leiby et al. 2012). Thus, citrate was used as an internal  
306 control.

307

### 308 *Analysis of metabolic data*

309 The rates of production for each metabolite are difficult to compare because of differences  
310 in the growth rates of the strains. To minimize this potentially confounding factor, we performed  
311 linear regression of the concentration of each metabolite against the remaining concentration of  
312 glucose. The magnitude of the slope of this relationship estimates the ratio of metabolite  
313 produced for each unit of glucose consumed, assuming an approximate equilibrium between the  
314 uptake of glucose and the release of metabolites into the medium. As glucose levels drop, however,  
315 there is increased uncertainty in the glucose measurements; moreover, as the glucose becomes  
316 scarce, the cells may begin to consume the excreted metabolites, which would bias our estimates  
317 of the production rates. To avoid these problems, we excluded time-points in the linear regressions  
318 for which the mean glucose concentration was below 0.8 mM. We chose this threshold because,  
319 at lower concentrations, growth curves showed clear signs of departure from exponential growth.  
320 We also excluded the measurements made at t=0 and, instead, we constrained the x-intercept of

321 the regressions to reflect the known initial concentrations in the media (i.e., 6 mM glucose and  
322 none of the overflow metabolites). To estimate how quickly the glucose was consumed, we  
323 performed regressions of glucose concentrations against time, using the same criteria for data  
324 exclusion. This approach provided a measure of growth rate that was insensitive to differences in  
325 cell size across strains.

326

## 327 **Results & Discussion**

### 328 *Private-droplet treatment selected for high numerical yield*

329 Our private droplet treatment was designed to minimize local competition between  
330 genotypes, thereby focusing selection upon increased numerical yield. To assess whether the  
331 emulsion-evolved populations underwent changes in numerical yield, we measured their cell  
332 densities, along with those of their ancestors, at the end of 24 hours of growth in the emulsion  
333 system. Providing some reassurance that salient features of the LTEE environment are maintained  
334 in our emulsion cultures, the decreases in numerical yield seen during the LTEE were also detected  
335 in emulsion -- the 20K and 60K ancestors had decreased numerical yield compared to the 0K  
336 ancestor (Figure 3, Table S3;  $p < 0.01$ , unpaired one-tailed t-tests). All 6 private droplet  
337 descendants had significantly increased numerical yield (cell number) compared with their direct  
338 ancestor (Figure 3, Table S2; BK 433:  $p < 0.05$ ; BK 431, BK 437, BK 438, BK 441, BK 442:  $p <$   
339  $0.01$ , unpaired two-tailed t-tests). Our shared-droplet treatment served as control for the private-  
340 droplet treatment, allowing local competition between genotypes, while controlling for growth in  
341 the emulsion environment. Two of the three shared-droplet descendants had increased numerical  
342 yield and one had decreased yield; however, the gains were less than those in the private-droplet  
343 treatment, and all three changes were non-significant. Combining the 0K, 20K, and 60K lines, the



344 private-droplet descendants were significantly more productive than the shared-droplet  
345 descendants ( $p=0.039$ , paired one-tailed t-test; see Supplementary section *Statistical Analysis*).  
346 The two evolutionary treatments had different effective population sizes. However, the weaker  
347 numerical-yield response in the shared-droplet treatment relative to the private-droplet treatment  
348 cannot be explained by the lack of mutational opportunity, because the number of cell divisions  
349 per transfer is actually greater in the shared-droplet treatment (see Supplementary section  
350 *Calculating Number of Cell Divisions in Droplets*). Taken together, these data confirm our  
351 prediction that the private-droplet treatment exerts stronger selection for increased numerical yield  
352 than does the shared-droplet treatment.

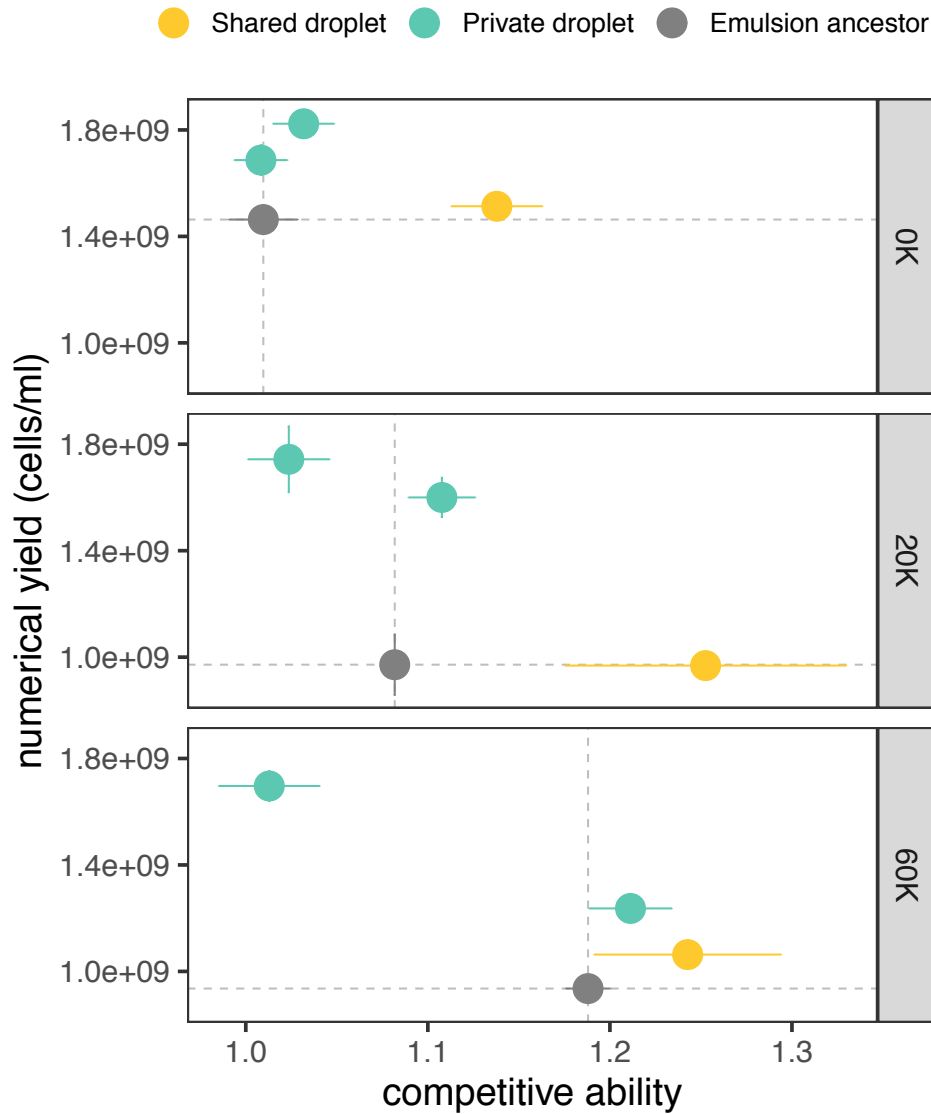

353

354 **Figure 3:** Numerical yield (cell density after the standard 24-hour growth cycle) compared to relative competitive

355 ability, both measured in the emulsion system. Each panel shows strains originating from a single emulsion ancestor

356 (in grey, at right) from the Ara-5 lineage of the LTEE (0, 20,000, and 60,000 generations). Colors indicate emulsion

357 evolution treatments (labels at top). The coordinate positions of each point are the averages of three replicate assays

358 for each phenotypic trait. Error bars show SEM; when they are not visible along either axis, the corresponding SEM

359 is smaller than the symbol itself. Dashed lines show the mean competitive ability and numerical yield of the relevant

360 ancestor.

361

362 In particular, the shared-droplet results demonstrate that the increase in numerical yield in  
363 the private-droplet treatment was not simply an evolutionary response to propagation under the  
364 emulsion conditions. Instead, these results imply that the initial density within a droplet affects the  
365 evolutionary outcome. By reducing competition between genotypes within the private droplets,  
366 selection has favored numerical yield.

367

### 368 *Shared droplet treatment favored competitive ability*

369 When resources are shared, selection for greater competitive ability is expected. To assess  
370 competitive ability, a focal strain was paired with a marked version of the 0K ancestor and  
371 proportions were tracked under high density emulsion conditions such that resources were shared  
372 between competitors. Again, emulsion populations showed consistent results with the batch culture  
373 environment used during the LTEE -- the competitive ability of the 20K ancestor was elevated  
374 compared to the 0K ancestor, and the 60K ancestor had a further increase over the 20K ancestor  
375 (Figure 3, Table S3;  $p < 0.05$  unpaired, one-tailed t-tests). Competitive ability increased in all three  
376 shared-droplet descendants that we tested (Figure 3). However, the change was significant relative  
377 to the corresponding emulsion ancestor only in the case of the line derived from the 0K ancestor  
378 (Table S2). Competitive ability also increased in three of the six private-droplet descendants, but  
379 none of these increases were significant, and the magnitudes of the increases were smaller than  
380 those observed in the shared-droplet treatment. Competitive ability decreased in the other three  
381 private-droplet descendants, and the decline was significant in one case (BK 441:  $p < 0.01$ ,  
382 unpaired two-tailed t-test). Combining the results from the 0K, 20K, and 60K lines, the shared-  
383 droplet descendants were significantly more competitive than the private-droplet descendants ( $p =$   
384 0.038, paired one-tailed t-test; see Supplementary section *Statistical Analysis*). Overall, these

385 results support our prediction that starting each droplet with multiple cells favors the evolution of  
386 increased competitive ability.

387

388 *Tradeoff between competitive ability and numerical yield*

389         If competitive ability and numerical yield strictly traded off, then competitive ability would  
390 decrease in the private-droplet treatment as numerical yield increased, and numerical yield would  
391 decrease in the shared-droplet treatment as competitive ability increased. However, we did not see  
392 such a strict tradeoff. Although the private-droplet descendants had larger gains in numerical yield,  
393 some shared-droplet descendants also experienced moderate gains in numerical yield. Similarly,  
394 although the shared-droplet descendants exhibited larger gains in competitive ability, some  
395 private-droplet descendants also showed moderate improvements in their competitive ability.  
396 Thus, these two traits do not strictly tradeoff with one another, and instead there seems to be some  
397 misalignment, in which larger gains in one trait sometimes occur with more modest gains in the  
398 other trait.

399         To develop this notion of misalignment further, we can contrast the case of a strict tradeoff,  
400 or pure antagonistic pleiotropy (Figure 4a), with two different scenarios of synergistic pleiotropy.  
401 The first synergistic scenario involves strict alignment, such that a mutation that is most beneficial  
402 for trait 1 is also the most beneficial for trait 2 (Figure 4b). In essence, this scenario is the opposite  
403 of strict antagonistic pleiotropy. The second form of synergism involves misalignment. In this  
404 scenario, all mutations simultaneously improve both traits, but the mutations that are the strongest  
405 for trait 1 are the weakest for trait 2, and *vice versa* (Figure 4c). Misalignment occurs when the  
406 relative effect of a mutation on one trait is the opposite of its relative effect on another trait.  
407 Therefore, antagonistic pleiotropy (Figure 4a) is also a case of misalignment, although the term is

408 broader than the traditional definition of “antagonism” (as illustrated in Figure 4c). In the  
409 Supplementary section, we develop a statistical test for misalignment. Using this test, we find that  
410 the increases in numerical yield in the private-droplet treatment came with concomitant weaker  
411 performance in competitive ability, while the improvements in competitive ability in the shared-  
412 droplet treatment came with weaker performance in numerical yield. Despite the absence of a strict  
413 tradeoff, these traits exhibited misalignment in our experiment. When two traits are misaligned,  
414 independent evolution in environments that favor one trait or the other can produce a pattern that  
415 supports a canonical tradeoff curve when the descendants are pooled across environments and the  
416 ancestors are ignored (i.e., considering only the colored points, while ignoring the grey points, in  
417 Figures 3 and 4c).

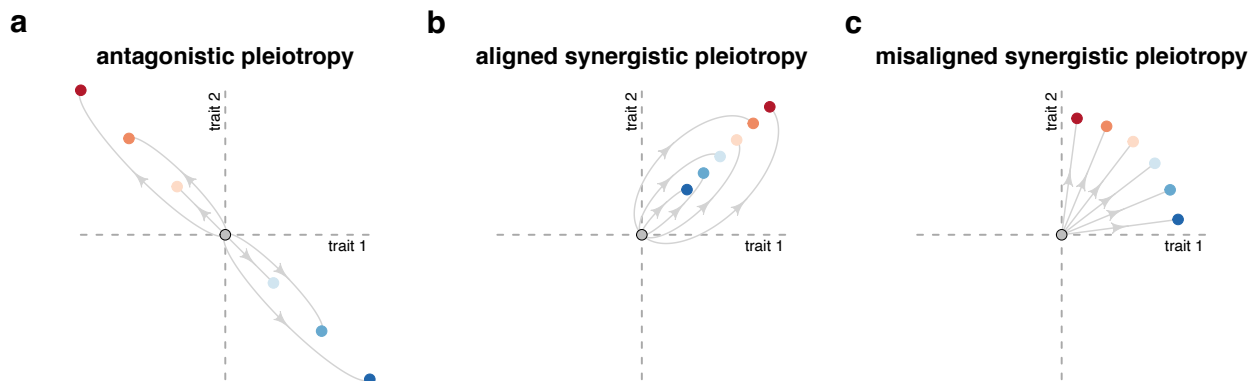

418 **Figure 4:** Three scenarios for pleiotropy with respect to two traits. The grey circle is the focal, ancestral genotype and  
419 the colored circles show the phenotypes of evolved genotypes. Here, fitness improvement with regard to a trait is  
420 taken to mean a *positive* change relative to the ancestor. (a) Antagonistic pleiotropy under a “strict tradeoff” situation,  
421 in which an improvement in one trait leads to a decline in the other, and the magnitude of enhancement in one  
422 dimension correlates with the magnitude of deterioration in the other. (b) Aligned synergistic pleiotropy describes a  
423 situation where the magnitude of improvement in one trait correlates with the magnitude of improvement in the other.  
424 (c) Misaligned synergistic pleiotropy describes a situation in which evolution improves both traits, but those genotypes  
425 with the strongest improvement in one trait have the weakest improvement in the other.  
426

427

#### 428 *Private-droplet treatment favored smaller cells*

429 While performing microscopy to assess droplet diameter (Supplemental Figures S8 & S9),

430 we noticed variation in cell size across the emulsion treatments. The cells that had evolved in

431 private droplets appeared smaller than cells that had evolved in shared droplets. We therefore  
432 decided to investigate this trait systematically. Figure 5 shows the relationship between cell size  
433 and numerical yield.

434 Both cell size and total biomass increased in all 12 LTEE populations during selection for  
435 increased competitive ability for shared resources despite the fact that neither is directly a target  
436 of selection under those conditions (Grant et al. 2021, Lenski & Mongold, 2000). This increase in  
437 cell size can be seen in our data for the three time points that we sampled from the Ara-5  
438 population, by comparing the values of the three grey points along the x-axis in Figure 5. For the  
439 emulsion evolved lines, the median cell volume decreased in all of the isolates from the private-  
440 droplet treatment, and the changes were significant in three cases (BK 437, BK 438, BK 441:  $p <$   
441  $0.01$ , unpaired, two-tailed t-test). Using an emulsion protocol similar to our private-droplet  
442 treatment, Bachman *et al.* (2013) also reported observing an evolved decrease in cell size in  
443 *Lactococcus lactis*. They noted that propagation in an emulsion system could favor such a change  
444 because any mutant that distributed the same total amount of biomass into a greater number of  
445 smaller cells would be able to colonize more droplets each transfer. Our shared-droplet treatment  
446 provides an appropriate control for this inference. Indeed, the median cell size actually increased  
447 slightly in all three replicates of this treatment, and the change was significant in one case (BK  
448 443:  $p < 0.01$ , unpaired, two-tailed t-test). The opposing directional changes in our two treatments  
449 indicates that neither the emulsion environment nor the transfer protocol (pooling all droplets and  
450 transferring only a fraction of cells to the next growth cycle, as shown in Figure 2a) was responsible  
451 for the consistently smaller cells seen in the private-droplet descendants. Instead, these findings  
452 support the hypothesis that smaller cells evolved in response to the reduced inter-genotype  
453 competition in the private-droplet treatment. When the 0K, 20K, and 60K lines are pooled, the

454 difference in cell size between the private-droplet and shared-droplet descendants is marginally  
455 significant ( $p=0.051$ , paired one-tailed t-test; see Supplementary section *Statistical Analysis*).  
456

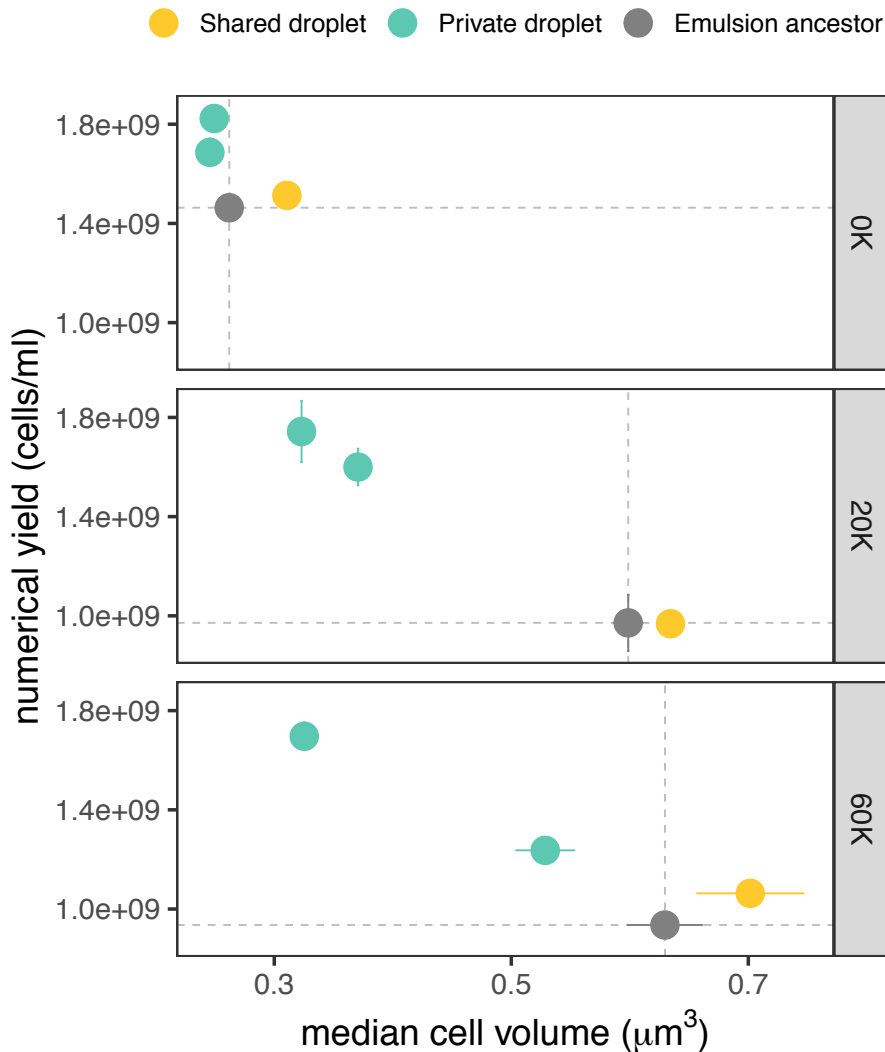

457  
458 **Figure 5:** Median cell volume compared to numerical yield. Each panel shows strains originating from a single  
459 emulsion ancestor (in grey, at right) from the Ara-5 lineage of the LTEE (0, 20,000, and 60,000 generations). Colors  
460 indicate emulsion evolution treatments (labels at top). The coordinate positions of each point show the average of  
461 three replicate assays for each phenotypic trait. Error bars show SEM; when they are not visible along either axis, the  
462 corresponding SEM is smaller than the symbol itself. Dashed lines show the mean numerical yield and cell volume  
463 of the relevant ancestor.

464

465 *Genome sequencing reveals mutations in phosphoenolpyruvate phosphotransferase system*

466         Given the evolution of smaller cells in the private-droplet treatment, we wondered if these  
467 populations were reverting to the ancestral state of the LTEE. After all, the progenitor of the LTEE  
468 (the 0K ancestor in our emulsion experiment) had very small cells. In particular, would the same  
469 genes and metabolic pathways that changed in the LTEE and led to larger cells in that experiment  
470 undergo reversion? Or would novel genetic and metabolic changes lead to a similar phenotypic  
471 endpoint? Also, would these changes depend on the particular LTEE-derived ancestor used in the  
472 emulsion experiment (e.g., 20K versus 60K)? To find out, we sequenced the complete genomes of  
473 14 emulsion-evolved descendants and their three corresponding ancestors.

474         This whole-genome sequencing revealed a total number of 13 mutations that distinguish  
475 the evolved descendants from their ancestors (Table S4). We saw no cases of identical mutations  
476 in multiple descendants, nor was any gene mutated in descendants that evolved in the two different  
477 treatments. However, three of the six descendants from the private-droplet treatment had point  
478 mutations in genes encoding proteins in the phosphoenolpyruvate (PEP) phosphotransferase  
479 system (PTS) (Table 1), which is involved in glucose uptake (Carmona et al. 2015; Escalante et  
480 al. 2012; Nam et al. 2001; New et al. 2014; Notley-Mcrobbs et al. 2006; Xia et al. 2017). All three  
481 of these descendants also had increased numerical yield and reduced cell size (Table S2), and all  
482 three were derived from the 20K and 60K emulsion ancestors. Of the three private-droplet  
483 descendants without mutations in PTS genes, two derived from the 0K ancestor, which already  
484 had high numerical yield in the emulsion conditions. The third private-droplet descendant without  
485 mutations in PTS genes derived from the 60K ancestor, and it exhibited much smaller changes in  
486 numerical yield and cell size than its counterpart with a PTS-associated mutation. The changes in  
487 numerical yield and cell size were also small for both of the private-droplet descendants derived



488 from the 0K ancestor, suggesting that the high-yield phenotype of the LTEE progenitor was largely  
 489 maintained. Bachmann et al. (2013) also found a point mutation in a PTS gene in one strain that  
 490 evolved increased numerical yield in emulsions, suggesting that PTS might have some role in  
 491 modulating numerical yield.

492 The PTS-associated mutations occurred in *ptsH*, which encodes a phosphocarrier protein;  
 493 *ptsG*, which encodes a subunit of the glucose transporter; and *crp*, which encodes a global  
 494 transcriptional regulator that affects some steps in glucose uptake (Kimata et al. 1997). Given that  
 495 these mutations include an early stop codon and non-conservative changes in amino acids, it is  
 496 likely that some or all of them cause reductions or even losses of function. Mutations in *pykF*,  
 497 which encodes pyruvate kinase, were among the earliest and most repeatable genetic changes in  
 498 the LTEE (Woods et al. 2006; Tenailon et al. 2016; Peng et al. 2018). These mutations presumably  
 499 reduce the conversion of PEP to pyruvate in central metabolism, which would leave more PEP  
 500 available to power the transport of PTS-dependent sugars. Indeed, distinct patterns of pleiotropy  
 501 were observed in the LTEE for various substrates that differed in terms of whether their uptake  
 502 requires the PTS (Travisano & Lenski, 1996). Thus, although the mutations selected in the private  
 503 droplet-treatment were not in the same genes as those responsible for phenotypic changes in the  
 504 LTEE, they appear to affect the same system.

505

| STRAIN (BK#) | LTEE GEN | POSITION | REF | ALT | ANNOTATION      | GENE        | DESCRIPTION                                         |
|--------------|----------|----------|-----|-----|-----------------|-------------|-----------------------------------------------------|
| 437          | 20K      | 2462747  | A   | C   | *86Y (TAA→TAC)  | <i>ptsH</i> | phosphocarrier protein Hpr                          |
| 437          | 20K      | 3414187  | G   | A   | E55K (GAA→AAA)  | <i>crp</i>  | cAMP-activated global transcriptional regulator CRP |
| 438          | 20K      | 1173797  | G   | A   | G454S (GGT→AGT) | <i>ptsG</i> | PTS glucose transporter subunit IIBC                |
| 441          | 60K      | 2462629  | T   | C   | L47P (CTG→CCG)  | <i>ptsH</i> | phosphocarrier protein Hpr                          |

506 **Table 1:** Mutations in private-droplet descendants associated with PTS.

507

508 *Slower glucose uptake and decreased overflow metabolism in private-droplet descendants*

509         Perhaps the private-droplet descendants achieved their higher numerical yield and smaller  
510 cell size in a physiologically similar way to the LTEE progenitor, despite genetic changes that did  
511 not merely reverse those that occurred during the LTEE. Because the mutations we found in the  
512 PTS system would be predicted to affect glucose transport, we decided to directly examine whether  
513 the private-droplet descendants had evolved toward a metabolic state, at least in terms of glucose  
514 use and overflow metabolite production, that resembled the LTEE progenitor.

515         We examined the concentrations of both glucose and various excreted metabolites in spent  
516 medium as the various bacterial strains grew in emulsions (Figure 6a). We observed that the  
517 glucose concentration for the 20K and 60K private-droplet descendants decreased more slowly  
518 than for the corresponding shared-droplet descendants, their ancestors, and the 0K descendants of  
519 either the shared or private droplets (Figure 6a, glucose panel). The slower glucose consumption  
520 was most pronounced in the private-droplet descendants that had mutations in PTS, indicating that  
521 these mutations likely simultaneously reduce the rate of glucose utilization while increasing  
522 numerical yield.

523         The primary metabolite that is excreted by *E. coli* growing on glucose, and by the LTEE  
524 lines in particular, is acetate (Harcombe et al. 2013). Acetate is a byproduct of both glycolysis and  
525 fermentation, which is a less efficient form of metabolism than respiration (Szenk et al. 2017). The  
526 0K emulsion evolution decedents did not markedly differ in metabolic signatures from the LTEE  
527 ancestor. However, we saw differences in acetate production between the private-droplet  
528 descendants from 20K and 60K and their emulsion ancestors. Specifically, the private-droplet  
529 descendants produced less acetate, which suggests they were more efficient at glucose metabolism

530 under these conditions than their ancestor. In contrast, some of the shared-droplet descendants  
531 accumulated higher levels of acetate (Fig. 6a). In both cases, the acetate concentration eventually  
532 declines as it is consumed by the cells after they have depleted the available glucose. Interestingly,  
533 in emulsion-evolved populations of a different strain of *E. coli* (MG1655), Rabbers et al. (2021)  
534 found an increased numerical yield was achieved with no change in acetate production. Those  
535 results are consistent with our observations for the 0K descendants but differ from what we observe  
536 in the 20K and 60K descendants, which suggests a history of rate adaptation may leave its mark  
537 on future evolution.

538 In addition to acetate, other organic acids such as formate and lactate can be generated by  
539 *E. coli* during growth on glucose. For all of the isolates in our study, either formate or lactate was  
540 generated, but not both. For the 0K lineages, formate was produced by all types (ancestor, private-  
541 droplet descendants, and shared-droplet descendant). For the 20K and 60K lineages, only the  
542 shared-droplet descendant produced formate, whereas lactate was produced by the 20K and 60K  
543 ancestors and their private-droplet descendants.

544 Differences between strains in the accumulated concentrations of excreted metabolites  
545 might reflect different production rates, but they might also be influenced by differences in growth  
546 rate, as well as subsequent consumption of those products. We therefore standardized these  
547 measurements by computing the rate of production of each excreted metabolite per unit of glucose  
548 consumed, and by excluding time points after the remaining glucose fell below a threshold  
549 concentration (see *Methods—Analysis of metabolic data*). After so doing, Figure 6b shows a  
550 positive relationship between the initial rate of glucose utilization and the fraction of this carbon  
551 that is “wasted” as excreted metabolites in the 20K and 60K emulsion lines. Carbon waste was  
552 calculated as a sum of the concentrations across all excreted metabolites concentrations, weighted

553 by the number of carbon atoms in each metabolite. The data indicate that the shared-droplet  
554 descendants use the glucose rapidly, but in a relatively wasteful way, whereas the private-droplet  
555 descendants consume glucose more slowly and efficiently.

556 We used these standardized rates (Table S5) to perform a principal components analysis  
557 (PCA; Figure 6c) in order to visualize the differences between the emulsion ancestors and their  
558 descendants. The metabolic changes between the 0K ancestor and its descendants were modest,  
559 but the changes in the 20K and 60K lines were much greater. For the 20K and 60K ancestors, the  
560 metabolic shifts in the private-droplet treatment were distinct from those in the shared-droplet  
561 treatment, while the overall patterns of change were nearly identical for the 20K and 60K lines.  
562 Thus, in addition to PTS-related mutations conferring high numerical yield for three of the four  
563 private-droplet descendants of these two ancestors, the magnitude and nature of the metabolic  
564 changes appear similar. One private-droplet descendant (derived from the 60K ancestor) exhibited  
565 a smaller decrease in cell size and a more moderate increase in numerical yield (Figure 5). This  
566 isolate also did not have mutations associated with PTS, and it differed somewhat less in its  
567 metabolic profile from its ancestor. On balance, therefore, we lack clear support for either the  
568 Mutational Access Hypothesis or the Strength of Selection Hypothesis (Figure 1). Nonetheless, it  
569 is clear that just one or a few novel genetic changes can restore, at least approximately, the  
570 ancestral phenotypes of slow growth, small cells, and high numerical yield, even after tens of  
571 thousands of generations that led to faster growth, larger cells, and lower numerical yield.

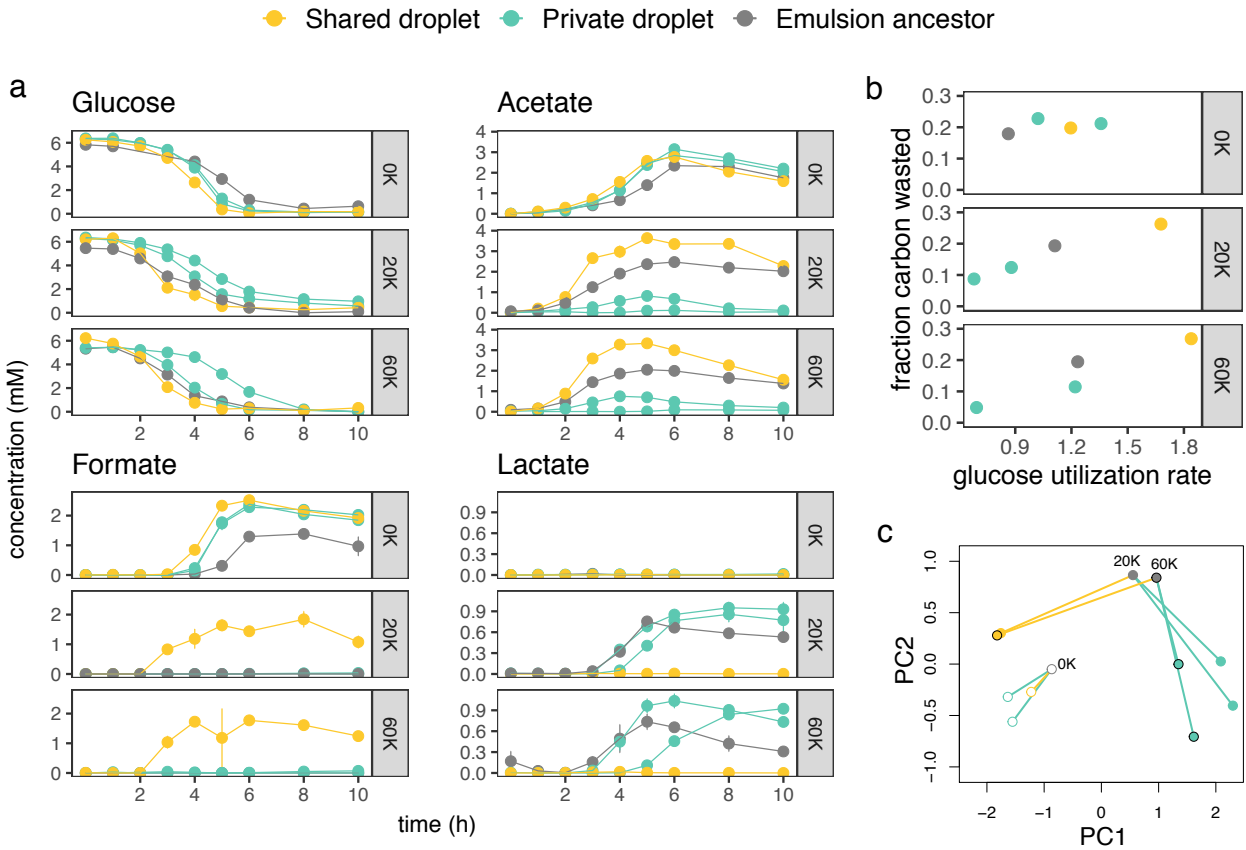

572

573 **Figure 6:** Glucose consumption and metabolite production. a) The concentrations of glucose, acetate, formate and  
 574 lactate over 10 hours. Each trajectory shows one strain, and each point along a trajectory is the average of up to three  
 575 replicates per strain. Colors indicate emulsion evolution treatments (labels at top). b) Glucose utilization versus the  
 576 fraction of carbon wasted. c) Principal components analysis (PCA) based on the strain-specific rates of excreted  
 577 metabolites per unit glucose consumed. The 0K strains are shown as empty points, the 20K strains as filled points  
 578 without borders, and the 60K strains as filled points with borders. Lines, colored by treatment, connect emulsion  
 579 ancestors (grey points) to their descendants.  
 580

### 581 *Summary*

582 Three of the four private-droplet descendants of the 20K and 60K ancestors achieved or  
 583 even surpassed the numerical yield of the ultimate LTEE progenitor (the 0K emulsion ancestor).  
 584 When compared to their ancestors, these high-yield descendants showed several parallel changes:  
 585 smaller cells, more efficient glucose metabolism, mutations in genes encoding the PTS, and lower  
 586 levels of acetate production. None of these changes occurred in the descendants that evolved from  
 587 the same ancestors under the shared-droplet treatment. While the increased numerical yield and

588 smaller cell size appeared to be reversions to the phenotypic state of the ultimate progenitor, the  
589 genetic and metabolic underpinnings of the descendants' phenotypes were distinct from those of  
590 the ultimate progenitor. Specifically, mutations in genes encoding the PTS were not responsible  
591 for evolutionary improvement in growth rate during the LTEE, and the metabolic profiles of the  
592 20K and 60K private-droplet descendants were distinct from that of the 0K emulsion ancestor (Fig.  
593 6c). Therefore, these data indicate a novel mechanistic basis for phenotypic reversion in this  
594 system. Specifically, mutations in the PTS likely involved a reduction in glucose uptake, thereby  
595 lowering the growth rate (and leading to a reduced competitive ability). However, these same  
596 mutations appear to lead to both smaller size and limited loss of carbon via overflow metabolites,  
597 thereby improving numerical yield. Notably, the same kind of mutations produced the phenotypic  
598 reversion for both the 20K and 60K emulsion lines.

599         Dollo's law of irreversibility states that "An organism never returns exactly to a former  
600 state, even if it finds itself placed in conditions of existence identical to those in which it has  
601 previously lived. But by virtue of the indestructibility of the past [...] it always keeps some trace  
602 of the intermediate stages through which it has passed" (Gould, 1970). Our experiment certainly  
603 did not return these organisms to their ancestral conditions. However, the private-droplet treatment  
604 was designed to place populations under selection for an ancestral phenotype, namely higher yield.  
605 Even as the private-droplet lineages derived from later generations of the LTEE recovered the high  
606 numerical yield of the LTEE ancestor, their phenotypic "return" did not involve a straightforward  
607 reversal of the steps in their evolutionary history. Rather, the mutational targets and metabolic  
608 patterns underlying their return were distinct from those evolutionary paths explored in the LTEE.  
609 By contrast, when under the same selection for increased numerical yield, the private-droplet  
610 descendants of the 0K emulsion ancestor exhibited genetic and metabolic changes distinct from

611 the 20K and 60K emulsion lines, suggesting that changes during the first 20,000 generations of  
612 the LTEE had altered the potential for subsequent adaptation to the private-droplet regime. Such  
613 contingency is a recurring feature of adaptation in biological systems (Blount et al. 2008; Card et  
614 al. 2019). However, we found no evidence of contingency in the later generations, as both the  
615 intermediate (20K) and late (60K) isolates from the LTEE readily recovered their ancestral form,  
616 seemingly by taking similar steps. Therefore, past evolution need not invariably alter future  
617 evolution, even when the future involves a return to the past.

618

619

620

621

622

623

624

625

626

627

628

629

630

631

## 632 **References**

633

634 Agrawal, A. A., Conner, J. K., & Rasmann, S. (2010). Tradeoffs and Negative Correlations in  
635 Evolutionary Ecology BT - Evolution Since Darwin. *Evolution Since Darwin*, (10), 243–  
636 268.

637 Bachmann, H., M. Fischlechner, I. Rabbers, N. Barfa, F. Branco dos Santos, D. Molenaar, and B.  
638 Teusink. 2013. “Availability of Public Goods Shapes the Evolution of Competing  
639 Metabolic Strategies.” *Proceedings of the National Academy of Sciences* 110(35):14302–7.  
640 doi: 10.1073/pnas.1308523110.

641

642 Barrick, J E, and Lenski, R. E. “Genome-wide mutational diversity in an evolving population of  
643 *Escherichia coli*.” *Cold Spring Harbor symposia on quantitative biology* vol. 74 (2009):  
644 119-29. doi:10.1101/sqb.2009.74.018

645

646 Barrick, J. E., Kauth, M. R., Strelisoff, C. C., & Lenski, R. E. (2010). *Escherichia coli* rpoB  
647 mutants have increased evolvability in proportion to their fitness defects. *Molecular Biology*  
648 *and Evolution*, 27(6), 1338–1347. <https://doi.org/10.1093/molbev/msq024>

649

650 Beardmore, R. E., Gudelj, I., Lipson, D. A., & Hurst, L. D. (2011). Metabolic trade-offs and the  
651 maintenance of the fittest and the flattest. *Nature*, 472(7343), 342–346.  
652 <https://doi.org/10.1038/nature09905>

653

654 Blount, Z. D., C. Z. Borland, and Lenski, R. E. 2008. Historical contingency and the evolution of  
655 a key innovation in an experimental population of *Escherichia coli*. *Proceedings of the*  
656 *National Academy of Sciences, USA* 105: 7899-7906.

657

658 Card, K. J., T. LaBar, J. B. Gomez, and Lenski, R. E. 2019. Historical contingency in the  
659 evolution of antibiotic resistance after decades of relaxed selection. *PLOS Biology* 17:  
660 e3000397.

661 Carmona, S. B., Moreno, F., Bolívar, F., Gosset, G., & Escalante, A. (2015). Inactivation of the  
662 PTS as a Strategy to Engineer the Production of Aromatic Metabolites in *Escherichia coli*.  
663 *Journal of Molecular Microbiology and Biotechnology*, 25(2–3), 195–208.  
664 <https://doi.org/10.1159/000380854>

665 Chou, H. H., Chiu, H. C., Delaney, N. F., Segrè, D., & Marx, C. J. (2011). Diminishing returns  
666 epistasis among beneficial mutations decelerates adaptation. *Science*, 332(6034), 1190–  
667 1192. <https://doi.org/10.1126/science.1203799>

668

669 Deatherage D.E., Barrick J. E. 2014. “Identification of Mutations in Laboratory-Evolved  
670 Microbes from Next-Generation Sequencing Data Using Breseq. In: Sun L., Shou W. (Eds)  
671 Engineering and Analyzing Multicellular Systems. *Methods in Molecular Biology (Methods*  
672 *and Protocols)*.” 1151:1–22. doi: 10.1007/978-1-4939-0554-6.



- 673 Escalante, A., Cervantes, A. S., Gosset, G., & Bolívar, F. (2012). Current knowledge of the  
674 *Escherichia coli* phosphoenolpyruvate-carbohydrate phosphotransferase system:  
675 Peculiarities of regulation and impact on growth and product formation. *Applied*  
676 *Microbiology and Biotechnology*, 94(6), 1483–1494. [https://doi.org/10.1007/s00253-012-](https://doi.org/10.1007/s00253-012-4101-5)  
677 4101-5
- 678 Eshelman, C. M., Vouk, R., Stewart, J. L., Halsne, E., Lindsey, H. a, Schneider, S., ... Kerr, B.  
679 (2010). Unrestricted migration favours virulent pathogens in experimental metapopulations:  
680 evolutionary genetics of a rapacious life history. *Philosophical Transactions of the Royal*  
681 *Society of London. Series B, Biological Sciences*, 365, 2503–2513.  
682 <https://doi.org/10.1098/rstb.2010.0066>
- 683 Farmer, I. S., & Jones, C. W. (1976). The Energetics of *Escherichia coli* during Aerobic Growth  
684 in Continuous Culture. *European Journal of Biochemistry*, 67(1), 115–122.  
685 <https://doi.org/10.1111/j.1432-1033.1976.tb10639>.
- 686 Gould, S. J. (1970). Dollo on Dollo ' s Law : Irreversibility and the Status of Evolutionary Laws  
687 Author ( s ): Stephen Jay Gould Source : Journal of the History of Biology , Vol . 3 , No . 2  
688 ( Autumn , 1970 ), pp . 189-212 Published by : Springer Stable URL : <http://www.jsto. J>  
689 *Hist Biol.*, 3(2), 189–212.  
690
- 691 Gounand, I., Daufresne, T., Gravel, D., Bouvier, C., Bouvier, T., Combe, M., ... Mouquet, N.  
692 (2016). Size evolution in microorganisms masks trade-offs predicted by the growth rate  
693 hypothesis. *Proceedings of the Royal Society B: Biological Sciences*, 283(1845), 20162272.  
694 <https://doi.org/10.1098/rspb.2016.2272>  
695
- 696 Grant, N. A., Abdel Magid, A., Franklin, J., Dufour, Y., & Lenski, R. E. (2021). Changes in Cell  
697 Size and Shape During 50,000 Generations of Experimental Evolution with *Escherichia*  
698 *coli*. *Journal of Bacteriology*, (March). <https://doi.org/10.1128/jb.00469-20>  
699
- 700 Guillaume, F., & Otto, S. P. (2012). Gene functional trade-offs and the evolution of pleiotropy.  
701 *Genetics*, 192(4), 1389–1409. <https://doi.org/10.1534/genetics.112.143214>  
702
- 703 Harcombe, W. R., Delaney, N. F., Leiby, N., Klitgord, N., & Marx, C. J. (2013). The Ability of  
704 Flux Balance Analysis to Predict Evolution of Central Metabolism Scales with the Initial  
705 Distance to the Optimum. *PLoS Computational Biology*, 9(6).  
706 <https://doi.org/10.1371/journal.pcbi.1003091>
- 707 Johnston, G. C., Ehrhardt, C. W., Lorincz, A., & Carter, B. L. A. (1979). Regulation of cell size  
708 in the yeast *Saccharomyces cerevisiae*. *Journal of Bacteriology*, 137(1), 1–5.  
709 <https://doi.org/10.1128/jb.137.1.1-5.1979>
- 710 Kerr, B., Neuhauser, C., Bohannan, B. J. M., & Dean, A. M. (2006). Local migration promotes  
711 competitive restraint in a host-pathogen “tragedy of the commons.” *Nature*, 442(7098), 75–  
712 78. <https://doi.org/10.1038/nature04864>  
713

- 714 Kimata, K., Takahashi, H., Inada, T., Postma, P., & Aiba, H. (1997). cAMP receptor protein-  
715 cAMP plays a crucial role in glucose-lactose diauxie by activating the major glucose  
716 transporter gene in *Escherichia coli*. *Proceedings of the National Academy of Sciences of*  
717 *the United States of America*, 94(24), 12914–12919.  
718 <https://doi.org/10.1073/pnas.94.24.12914>  
719
- 720 Leiby, N., Harcombe, W. R., & Marx, C. J. (2012). Multiple long-term, experimentally-evolved  
721 populations of *Escherichia coli* acquire dependence upon citrate as an iron chelator for  
722 optimal growth on glucose. *BMC Evolutionary Biology*, 12(1).  
723 <https://doi.org/10.1186/1471-2148-12-151>
- 724 Leiby, N., & Marx, C. J. (2014). Metabolic Erosion Primarily Through Mutation Accumulation,  
725 and Not Tradeoffs, Drives Limited Evolution of Substrate Specificity in *Escherichia coli*.  
726 *PLoS Biology*, 12(2). <https://doi.org/10.1371/journal.pbio.1001789>
- 727 Lenski, R. E. 2017. “Experimental Evolution and the Dynamics of Adaptation and Genome  
728 Evolution in Microbial Populations.” *The ISME Journal* 1–14. doi: 10.1038/ismej.2017.69.
- 729 Lenski, R. E., and Travisano, M. 1994. “Dynamics of Adaptation and Diversification: A 10,000-  
730 Generation Experiment with Bacterial Populations.” *Proceedings of the National Academy*  
731 *of Sciences of the United States of America* 91(15):6808–14. doi: 10.1073/pnas.91.15.6808.  
732
- 733 Levin, B. R., Lipsitch, M., Perrot, V., Schrag, S., Antia, R., Simonsen, L., ... Stewart, F. M.  
734 (1997). The population genetics of antibiotic resistance. *Clinical Infectious Diseases : An*  
735 *Official Publication of the Infectious Diseases Society of America*, 24 Suppl 1, S9-16.  
736 Retrieved from <http://www.ncbi.nlm.nih.gov/pubmed/8994776>  
737
- 738 Manhart, M., Adkar, B. V., & Shakhnovich, E. I. (2016). *Tradeoffs between microbial growth*  
739 *phases lead to frequency-dependent and non-transitive selection*.  
740 <https://doi.org/http://dx.doi.org/10.1101/096453>
- 741 Monds, R. D., Lee, T. K., Colavin, A., Ursell, T., Quan, S., Cooper, T. F., & Huang, K. C.  
742 (2014). Systematic Perturbation of Cytoskeletal Function Reveals a Linear Scaling  
743 Relationship between Cell Geometry and Fitness. *Cell Reports*, 9(4), 1528–1537.  
744 <https://doi.org/10.1016/j.celrep.2014.10.040>
- 745 Mongold, J. A., and Lenski, R. E. 1996. Experimental rejection of a nonadaptive explanation for  
746 increased cell size in *Escherichia coli*. *Journal of Bacteriology* 178: 5333-5334.
- 747 Nam, T. W., Cho, S. H., Shin, D., Kim, J. H., Jeong, J. Y., Lee, J. H., ... Seok, Y. J. (2001). The  
748 *Escherichia coli* glucose transporter enzyme IICBGlc recruits the global repressor Mlc.  
749 *EMBO Journal*, 20(3), 491–498. <https://doi.org/10.1093/emboj/20.3.491>
- 750 New, A. M., Cerulus, B., Govers, S. K., Perez-Samper, G., Zhu, B., Boogmans, S., ...  
751 Verstrepen, K. J. (2014). Different Levels of Catabolite Repression Optimize Growth in

- 752 Stable and Variable Environments. *PLoS Biology*, 12(1), 17–20.  
753 <https://doi.org/10.1371/journal.pbio.1001764>
- 754 Notley-McRobb, L., Death, A., & Ferenci, T. (2006). The relationship between external glucose  
755 concentration and cAMP levels inside. *Biochemical Journal*, (1997), 1909–1918.  
756 <https://doi.org/10.1099/00221287-143-6-1909>
- 757 Novak, M., Pfeiffer, T., Lenski, R. E., Sauer, U., & Bonhoeffer, S. (2006). Experimental tests for  
758 an evolutionary trade-off between growth rate and yield in *E. coli*. *The American Naturalist*,  
759 168(2), 242–251. <https://doi.org/10.1086/506527>
- 760 Pavličev, M., & Cheverud, J. M. (2015). Constraints Evolve: Context Dependency of Gene  
761 Effects Allows Evolution of Pleiotropy. *Annual Review of Ecology, Evolution, and*  
762 *Systematics*, 46(1), 413–434. <https://doi.org/10.1146/annurev-ecolsys-120213-091721>  
763
- 764 Peng, F., Widmann, S., Wünsche, A., Duan, K., Donovan, K. A., Dobson, R. C. J., ... Cooper, T.  
765 F. (2018). Effects of Beneficial Mutations in *pykF* Gene Vary over Time and across  
766 Replicate Populations in a Long-Term Experiment with Bacteria. *Molecular Biology and*  
767 *Evolution*, 35(1), 202–210. <https://doi.org/10.1093/molbev/msx279>  
768
- 769 Pennings, P. S., Ogbunugafor, C. B., & Hershberg, R. (2020). Reversion is most likely under  
770 high mutation supply, when compensatory mutations don't fully restore fitness costs.  
771 *BioRxiv*. <https://doi.org/10.1101/2020.12.28.424568>
- 772 Pfeiffer, T., Schuster, S., & Bonhoeffer, S. (2001). *Cooperation and Competition in the*  
773 *Evolution of ATP-Producing Pathways*. 292(April).
- 774 Pierucci, O. (1978). Dimensions of *Escherichia coli* at various growth rates: model for envelope  
775 growth. *Journal of Bacteriology*, 135(2), 559–574.
- 776 Ostrowski, E. A., Ofria, C., & Lenski, R. E. (2015). Genetically integrated traits and rugged  
777 adaptive landscapes in digital organisms Experimental evolution. *BMC Evolutionary*  
778 *Biology*, 15(1), 1–14. <https://doi.org/10.1186/s12862-015-0361-x>
- 779 Quandt, E. M., Gollihar, J., Blount, Z. D., Ellington, A. D., Georgiou, G., & Barrick, J. E.  
780 (2015). Fine-tuning citrate synthase flux potentiates and refines metabolic innovation in the  
781 lenski evolution experiment. *ELife*, 4(OCTOBER2015), 1–22.  
782 <https://doi.org/10.7554/eLife.09696>
- 783 Rabbers, I., Gottstein, W., Feist, A., Teusink, B., & Bruggeman, F. J. (2021). Selection for cell  
784 yield does not reduce overflow metabolism in *E. coli*. *BioRxiv*, 2021.05.24.445453.  
785 Retrieved from <https://doi.org/10.1101/2021.05.24.445453>
- 786 Robinson, J. T., Thorvaldsdóttir, H., Winckler, W., Guttman, M., Lander, E. S., Getz, G., &  
787 Mesirov, J. P. (2011). Integrative Genomics Viewer. *Nature Biotechnology*, 29(1), 24–26.  
788 <https://doi.org/10.1038/nbt0111-24>

- 789 Rose, M. (1982). *Antagonistic pleiotropy, dominance, and genetic variation*\*. 48(2501).  
790
- 791 Rose, M. R. (1985). Life history evolution with antagonistic pleiotropy and overlapping  
792 generations. *Theoretical Population Biology*, 28(3), 342–358. [https://doi.org/10.1016/0040-](https://doi.org/10.1016/0040-5809(85)90034-6)  
793 5809(85)90034-6  
794
- 795 Schank, J., & Wimsatt, W. (2011). *Generative Entrenchment and Evolution Author ( s): Jeffrey*  
796 *C . Schank and William C . Wimsatt Source : PSA : Proceedings of the Biennial Meeting of*  
797 *the Philosophy of Science Association , Vol . 1986 , Volume Two : Symposia and Invited*  
798 *Papers ( 1986 ) , pp. 1986(1986), 33–60.*  
799
- 800 Shah, P., McCandlish, D. M., & Plotkin, J. B. (2015). Contingency and entrenchment in protein  
801 evolution under purifying selection. *Proceedings of the National Academy of Sciences of the*  
802 *United States of America*, 112(25), E3226–E3235. <https://doi.org/10.1073/pnas.1412933112>  
803
- 804 Stearns, S. C. 1989. “Trade-Offs in Life-History Evolution Published by: British Ecological  
805 Society Stable URL: <https://www.jstor.org/stable/2389364> Trade-Offs in Life-History  
806 Evolution.” *Functional Ecology* 3(3):259–68.  
807
- 808 Stevenson, K., McVey, A. F., Clark, I. B. N., Swain, P. S., & Pilizota, T. (2016). General  
809 calibration of microbial growth in microplate readers. *Scientific Reports*, 6(December), 4–  
810 10. <https://doi.org/10.1038/srep38828>
- 811 Szenk, M., Dill, K. A., & de Graff, A. M. R. (2017). Why Do Fast-Growing Bacteria Enter  
812 Overflow Metabolism? Testing the Membrane Real Estate Hypothesis. *Cell Systems*, 5(2),  
813 95–104. <https://doi.org/10.1016/j.cels.2017.06.005>
- 814 Tenailon, O., J. E. Barrick, N. Ribeck, D. E. Deatherage, J. L. Blanchard, A. Dasgupta, G. C.  
815 Wu, S. Wielgoss, S. Cruveiller, C. Médigue, D. Schneider, and R. E. Lenski. 2016. Tempo  
816 and mode of genome evolution in a 50,000-generation experiment. *Nature* 536: 165-170.
- 817 Teotónio, H., & Rose, M. R. (2000). Variation in the reversibility of evolution. *Nature*,  
818 408(6811), 463–466. <https://doi.org/10.1038/35044070>
- 819 Travisano, M., and R. E. Lenski. 1996. “Long-Term Experimental Evolution in Escherichia Coli.  
820 IV. Targets of Selection and the Specificity of Adaptation.” *Genetics* 143(1):15–26. doi:  
821 10.1007/s000360050052.  
822
- 823 van Tatenhove-Pel, R. J., Zwering, E., Boreel, D. F., Falk, M., van Heerden, J. H., Kes, M. B. M.  
824 J., ... Bachmann, H. (2021). Serial propagation in water-in-oil emulsions selects for  
825 *Saccharomyces cerevisiae* strains with a reduced cell size or an increased biomass yield on  
826 glucose. *Metabolic Engineering*, 64(November 2020), 1–14.  
827 <https://doi.org/10.1016/j.ymben.2020.12.005>  
828

- 829 Vasi, F., Travisano, M., & Lenski, R. E. (1994). Long-Term Experimental Evolution in  
830 *Escherichia coli* . II . Changes in Life-History Traits During Adaptation to a Seasonal  
831 Environment. *The University of Chicago Press* 144(3), 432–456.  
832
- 833 Velicer, G. J. (1999). Pleiotropic effects of adaptation to a single carbon source for growth on  
834 alternative substrates. *Applied and Environmental Microbiology*, 65(1), 264–269.  
835 <https://doi.org/10.1128/aem.65.1.264-269.1999>  
836
- 837 Wisner, M. J., Ribeck, N., and Lenski, R. E. 2013. “Long-Term Dynamics of Adaptation in  
838 Asexual Populations.” *Science (New York, N.Y.)* 342(6164):1364–67. doi:  
839 10.1126/science.1243357.  
840
- 841 Woods, R. J., Barrick, J. E., Cooper, T. F., Shrestha, U., Kauth, M. R., & Lenski, R. E. (2011).  
842 *Second-Order Selection for Evolvability in a Large Escherichia coli Population*. (March),  
843 1433–1437.  
844
- 845 Woods, R., D. Schneider, C. L. Winkworth, M. A. Riley, and Lenski, R. E. (2006). Tests of  
846 parallel molecular evolution in a long-term experiment with *Escherichia coli*. *Proceedings*  
847 *of the National Academy of Sciences, USA* 103:9107-9112.  
848
- 849 Xia, T., Sriram, N., Lee, S. A., Altman, R., Urbauer, J. L., Altman, E., and Eiteman, M. A. 2017.  
850 “Glucose Consumption in Carbohydrate Mixtures by Phosphotransferase-System Mutants  
851 of *Escherichia Coli*.” *Microbiology (United Kingdom)* 163(6):866–77. doi:  
852 10.1099/mic.0.000480.  
853
- 854 Yulo, P. R. J., & Hendrickson, H. L. (2019). The evolution of spherical cell shape; progress and  
855 perspective. *Biochemical Society Transactions*, 47(6), 1621–1634.  
856 <https://doi.org/10.1042/BST20180634>  
857  
858  
859  
860  
861  
862  
863  
864  
865  
866  
867  
868  
869  
870  
871  
872  
873  
874

875

876

877

878
